# Supplementary material for: Expression Analyses of Embryogenesis-Associated Genes during Somatic Embryogenesis of Adiantum capillus-veneris L. In vitro: New Insights into the Evolution of Reproductive Organs in Land Plants
Source: Front Plant Sci. 2017 Apr 27;8:658. doi: 10.3389/fpls.2017.00658 (PMC5406782; doi:10.3389/fpls.2017.00658)
Supplement: Table S4 — MADS-box family sequences and accession numbers. [file Table4.xlsx]

## Sheet: MADS
MADS-box family sequences and accession numbers
Species name	Number	Locus name	Name	Note
Volvox carteri	1	Vocar.0014s0224.1	VcaMADS
Micromonas pusilla	1	64870	MicMADS
Klebsormidium flaccidum	1	kfl00560_0030_v1.1	KflMADS
Marchantia polymorpha	2	Mapoly0011s0161.1.p	MpoMADS1
		Mapoly0174s0011.1.p	MpoMADS2
Physcomitrella patens	8	Pp3c12_22500V3.1	PpaMADS1
		Pp3c12_22890V3.1	PpaMADS2
		Pp3c1_30500V3.1	PpaMADS3
		Pp3c14_14900V3.1	PpaMADS4
		Pp3c14_22180V3.1	PpaMADS5
		Pp3c17_5920V3.1	PpaMADS6
		Pp3c3_31980V3.1	PpaMADS7
		Pp3c4_540V3.1	PpaMADS8
Adiantum capillus-veneris	8	cds.c13317_g2_i1|m.17476	AcaMADS1	using for real
		cds.c30903_g1_i1|m.52345	AcaMADS2
		cds.c12243_g1_i2|m.15301	AcaMADS3
		cds.c19576_g1_i1|m.36594	AcaMADS4
		cds.c31351_g1_i1|m.52954	AcaMADS5
		cds.c18486_g1_i1|m.32237	AcaMADS6
		cds.c12243_g1_i1|m.15298	AcaMADS7
		cds.c18974_g1_i3|m.34169	AcaMADS8
Picea glauca	32	Pgl000081	PglMADS1
		Pgl001105	PglMADS2
		Pgl001170	PglMADS3
		Pgl003236	PglMADS4
		Pgl005820	PglMADS5
		Pgl006000	PglMADS6
		Pgl006542	PglMADS7
		Pgl006590	PglMADS8
		Pgl006620	PglMADS9
		Pgl006856	PglMADS10
		Pgl006966	PglMADS11
		Pgl007001	PglMADS12
		Pgl007150	PglMADS13
		Pgl007184	PglMADS14
		Pgl007854	PglMADS15
		Pgl012513	PglMADS16
		Pgl012597	PglMADS17
		Pgl012684	PglMADS18
		Pgl012689	PglMADS19
		Pgl012934	PglMADS20
		Pgl012988	PglMADS21
		Pgl013138	PglMADS22
		Pgl013192	PglMADS23
		Pgl013421	PglMADS24
		Pgl013512	PglMADS25
		Pgl013704	PglMADS26
		Pgl013990	PglMADS27
		Pgl014502	PglMADS28
		Pgl016779	PglMADS29
		Pgl016989	PglMADS30
		Pgl017637	PglMADS31
		Pgl017859	PglMADS32
Amborella trichopoda	19	AmTr_v1.0_scaffold00001.225	AtrAP3.1
		AmTr_v1.0_scaffold00001.409	AtrTM3
		AmTr_v1.0_scaffold00001.413	AtrAGL6
		AmTr_v1.0_scaffold00001.461	AtrGMM13.1
		AmTr_v1.0_scaffold00013.53	AtrAGL9
		AmTr_v1.0_scaffold00013.60	AtrTM8.2
		AmTr_v1.0_scaffold00021.296	AtrAG
		AmTr_v1.0_scaffold00046.134	AtrANR1.2
		AmTr_v1.0_scaffold00047.105	AtrAP1
		AmTr_v1.0_scaffold00047.121	AtrAGL2
		AmTr_v1.0_scaffold00053.185	AtrAGL15
		AmTr_v1.0_scaffold00066.97	AtrAP3.2
		AmTr_v1.0_scaffold00071.203	AtrSTK
		AmTr_v1.0_scaffold00089.36	AtrPI.2
		AmTr_v1.0_scaffold00127.17	AtrStM11
		AmTr_v1.0_scaffold00010.504	AtrMP
		AmTr_v1.0_scaffold00010.217	AtrMS
		AmTr_v1.0_scaffold00001.226	AtrOsM32
		AmTr_v1.0_scaffold00071.216	AtrAGL12
Oryza sativa	31	LOC_Os01g10504.1	OsaMADS3
		LOC_Os05g11414.1	OsaMADS58
		LOC_Os02g45770.1	OsaMADS6
		LOC_Os03g11614.1	OsaMADS1
		LOC_Os02g49840.1	OsaMADS57
		LOC_Os04g49150.1	OsaMADS17
		LOC_Os06g06750.1	OsaMADS5
		LOC_Os10g39130.1	OsaMADS56
		LOC_Os07g41370.1	OsaMADS18
		LOC_Os02g36924.1	OsaMADS27
		LOC_Os08g33488.1	OsaMADS23
		LOC_Os04g23910.1	OsaMADS25
		LOC_Os02g07430.1	OsaMADS29
		LOC_Os03g54170.1	OsaMADS34
		LOC_Os03g54160.1	OsaMADS14
		LOC_Os08g02070.1	OsaMADS26
		LOC_Os12g10520.1	OsaMADS33
		LOC_Os07g01820.1	OsaMADS15
		LOC_Os12g31748.1	OsaMADS20
		LOC_Os01g66030.1	OsaMADS2
		LOC_Os02g52340.1	OsaMADS22
		LOC_Os06g45650.1	OsaMADS30
		LOC_Os04g52410.1	OsaMADS31
		LOC_Os06g49840.1	OsaMADS16
		LOC_Os03g08754.1	OsaMADS47
		LOC_Os05g34940.1	OsaMADS4
		LOC_Os08g38590.1	OsaMADS62
		LOC_Os01g52680.1	OsaMADS32
		LOC_Os06g11330.1	OsaMADS55
		LOC_Os06g11970.1	OsaMADS63
		LOC_Os11g43740.1	OsaMADS68
Arabidopsis thaliana	42	AT1G22130.1	AthAGL104
		AT1G77980.1	AthAGL66
		AT1G77950.1	AthAGL67
		AT1G18750.1	AthAGL65
		AT1G69540.1	AthAGL94
		AT3G58780.1	AthSHP1
		AT4G18960.1	AthAG
		AT2G42830.1	AthSHP2
		AT2G45650.1	AthAGL6
		AT4G11880.1	AthAGL14
		AT2G03710.1	AthSEP4
		AT2G03060.1	AthAGL30
		AT5G15800.1	AthSEP1
		AT5G10140.1	AthFLC
		AT2G45660.1	AthSOC1
		AT5G51870.1	AthAGL71
		AT3G57390.1	AthAGL18
		AT3G02310.1	AthSEP2
		AT5G13790.1	AthAGL15
		AT1G26310.1	AthCAL1
		AT4G22950.1	AthGL19
		AT3G57230.1	AthAGL16
		AT5G23260.1	AthTT16
		AT5G60910.1	AthFUL
		AT3G30260.1	AthAGL79
		AT5G65070.1	AthFCL4
		AT5G62165.1	AthAGL42
		AT1G69120.1	AthAP1
		AT3G61120.1	AthAGL13
		AT3G54340.1	AthAP3
		AT4G24540.1	AthAGL24
		AT2G14210.1	AthANR1
		AT2G22630.1	AthAGL17
		AT1G71692.1	AthXAL1
		AT5G20240.1	AthPI
		AT4G37940.1	AthAGL21
		AT2G22540.1	AthSVP
		AT5G65050.1	AthMAF2
		AT2G26320.1	AthAGL33
		AT5G65060.1	AthFCL3
		AT5G65080.1	AthMAF5
		AT1G77080.4	AthFLM

## Sheet: AP2 (BBM)
AP2 family sequences and accession numbers
Species name	Number	Locus name	Name	Note
Volvox carteri	10	Vocar.0001s1269.1.p	VcaAP21
		Vocar.0017s0120.1.p	VcaAP22
		Vocar.0023s0184.1.p	VcaAP23
		Vocar.0023s0210.1.p	VcaAP24
		Vocar.0023s0123.1.p	VcaAP25
		Vocar.0023s0128.1.p	VcaAP26
		Vocar.0042s0048.1.p	VcaAP27
		Vocar.0008s0074.1.p	VcaAP28
		Vocar.0037s0091.1.p	VcaAP29
		Vocar.0009s0293.1.p	VcaAP210
Klebsormidium flaccidum	3	kfl00143_0060	KflAP21
		kfl00657_0020	KflAP22
		kfl00124_0020	KflAP23
Marchantia polymorpha	4	Mapoly0008s0071.1	MpoAP21
		Mapoly0048s0045.1	MpoAP22
		Mapoly0009s0013.1	MpoAP23
		Mapoly0144s0031.1	MpoAP24
Physcomitrella patens	17	Pp3c10_24550V3.1	PpaAP21
		Pp3c11_13880V3.1	PpaAP22
		Pp3c12_12460V3.1	PpaAP23
		Pp3c12_15970V3.1	PpaAP24
		Pp3c12_16100V3.1	PpaAP25
		Pp3c15_24790V3.1	PpaAP26
		Pp3c15_24980V3.1	PpaAP27
		Pp3c18_3900V3.1	PpaAP28
		Pp3c23_13360V3.1	PpaAP29
		Pp3c7_17700V3.1	PpaAP210
		Pp3c7_18530V3.1	PpaAP211
		Pp3c9_25400V3.1	PpaAP212
		Pp3c9_25570V3.1	PpaAP213
		Pp3c5_2780V3.1	PpaAP214
		Pp3c6_21840V3.1	PpaAP215
		Pp3c15_4400V3.1	PpaAP216
		Pp3c22_17873V3.1	PpaAP217
Selaginella moellendorffii	10	129793	SmoAP21
		17086	SmoAP22
		17087	SmoAP23
		411646	SmoAP24
		78076	SmoAP25
		85823	SmoAP26
		96572	SmoAP27
		98831	SmoAP28
		48904	SmoAP29
		404737	SmoAP210
Adiantum capillus-veneris	6	cds.c26406_g1_i1	AcaBBML	using for real
		cds.c597_g1_i1	AcaAP21
		cds.c5883_g1_i1	AcaAP22
		cds.c7769_g1_i1	AcaAP23
		cds.c13771_g1_i1	AcaAP24
		cds.c40261_g1_i1	AcaAP25
Picea abies	12	MA_10432141g0020	PabAP21
		MA_121578g0010	PabAP22
		MA_121581g0010	PabAP23
		MA_130948g0020	PabAP24
		MA_2193g0020	PabAP25
		MA_30905g0010	PabAP26
		MA_67041g0010	PabAP27
		MA_8090186g0010	PabAP28
		MA_86195g0010	PabAP29
		MA_98095g0010	PabAP210
		MA_10434312g0010	PabAP211
		MA_75070g0010	PabAP212
Amborella trichopoda	11	AmTr_v1.0_scaffold00019.292	AtrAP21
		AmTr_v1.0_scaffold00019.64	AtrAP22
		AmTr_v1.0_scaffold00024.229	AtrAP23
		AmTr_v1.0_scaffold00035.43	AtrAP24
		AmTr_v1.0_scaffold00058.233	AtrAP25
		AmTr_v1.0_scaffold00065.42	AtrAP26
		AmTr_v1.0_scaffold00066.6	AtrAP27
		AmTr_v1.0_scaffold00101.2	AtrAP28
		AmTr_v1.0_scaffold00202.3	AtrAP29
		AmTr_v1.0_scaffold00159.24	AtrAP210
		AmTr_v1.0_scaffold00022.332	AtrAP211
Oryza sativa	22	LOC_Os01g59780.1	Os01g59780
		LOC_Os01g67410.1	OsaBBM2
		LOC_Os02g40070.1	OsaPLE1
		LOC_Os03g07940.1	Os03g07940
		LOC_Os03g12950.1	OsaAIN1
		LOC_Os03g19900.1	Os03g19900
		LOC_Os03g56050.1	OsaAIN2
		LOC_Os03g60430.1	Os03g60430
		LOC_Os04g42570.1	OsaBBM3
		LOC_Os04g55970.1	OsaAIN3
		LOC_Os05g03040.1	Os05g03040
		LOC_Os05g32270.1	Os05g32270
		LOC_Os05g45954.1	Os05g45954
		LOC_Os06g05340.1	Os06g05340
		LOC_Os06g43220.1	Os06g43220
		LOC_Os06g44750.1	Os06g44750
		LOC_Os07g03250.1	OsaPLE2
		LOC_Os07g13170.1	Os07g13170
		LOC_Os08g34360.1	Os08g34360
		LOC_Os11g03540.1	Os11g03540
		LOC_Os11g19060.1	OsaBBM1
		LOC_Os12g03290.1	Os12g03290
Arabidopsis thaliana	18	AT1G16060.1	AthADAP
		AT1G51190.1	AthPLT2
		AT1G72570.1	AthAIL1
		AT1G79700.1	Ath1G79700
		AT3G20840.1	AthPLT1
		AT3G54320.1	AthWRI1
		AT4G36920.1	AthFL1
		AT4G37750.1	AthANT
		AT5G10510.1	AthPLT3
		AT5G17430.1	AthBBM
		AT5G57390.1	AthAIL5
		AT5G65510.1	AthAIL7
		AT5G67180.1	AthTOE3
		AT2G41710.1	Ath2G41710
		AT2G28550.1	AthTOE1
		AT3G54990.1	AthSMZ
		AT5G60120.1	AthTOE2
		AT2G39250.1	AthSNZ

## Sheet: LBD
LBD family sequences and accession numbers
Species name	Number	Locus name	Name	Note
Klebsormidium flaccidum	3	kfl00209_0160	kflLBD1
		kfl00147_0060	kflLBD2
		kfl00255_0040	kflLBD3
Marchantia polymorpha	23	Mapoly0004s0047.1	MpoLBD1
		Mapoly0008s0060.1	MpoLBD2
		Mapoly0009s0166.1	MpoLBD3
		Mapoly0011s0037.1	MpoLBD4
		Mapoly0046s0060.1	MpoLBD5
		Mapoly0050s0090.1	MpoLBD6
		Mapoly0051s0062.1	MpoLBD7
		Mapoly0058s0090.1	MpoLBD8
		Mapoly0060s0092.1	MpoLBD9
		Mapoly0080s0037.1	MpoLBD10
		Mapoly0084s0032.1	MpoLBD11
		Mapoly0093s0018.1	MpoLBD12
		Mapoly0093s0069.1	MpoLBD13
		Mapoly0097s0062.1	MpoLBD14
		Mapoly0152s0027.1	MpoLBD15
		Mapoly0153s0039.1	MpoLBD16
		Mapoly0173s0030.1	MpoLBD17
		Mapoly0176s0008.1	MpoLBD18
		Mapoly0721s0001.1	MpoLBD19
		Mapoly0817s0001.1	MpoLBD20
		Mapoly1185s0001.1	MpoLBD21
		Mapoly1803s0001.1	MpoLBD22
		Mapoly3661s0001.1	MpoLBD23
Physcomitrella patens	26	Pp1s19_217V6; Phypa_427240	PpLBD1	name from Y Coudert et al., 2013
		Pp1s192_67V6; Phypa_449980	PpLBD2
		Pp1s73_7V6; Phypa_437737	PpLBD3
		Pp1s261_2V6; Phypa_454529	PpLBD4
		Pp1s66_56V6; Phypa_436610	PpLBD5
		Pp1s156_26V6; Phypa_447021	PpLBD6
		Pp1s134_49V6; Phypa_445048	PpLBD7
		Pp1s71_7V6; Phypa_437365	PpLBD8
		Pp1s170_93V6; Phypa_448327	PpLBD9
		Pp1s56_77V6; Phypa_434939	PpLBD10
		Pp1s203_51V6; Phypa_450840	PpLBD11
		Pp1s170_78V6; Phypa_448289	PpLBD12
		Pp1s184_36V6; Phypa_449422	PpLBD13
		Pp1s35_338V6; Phypa_430967	PpLBD14
		Pp1s12_355V6; Phypa_425353	PpLBD16
		Pp1s9_303V6; Phypa_424621	PpLBD17
		Pp1s13_89V6; Phypa_425775	PpLBD18
		Pp1s9_450V6; Phypa_424514	PpLBD19
		Pp1s9_186V6; Phypa_424643	PpLBD20
		Pp1s41_47V6; Phypa_432275	PpLBD21
		Pp1s167_34V6; Phypa_448058	PpLBD22
		Pp1s157_25V6; Phypa_447189	PpLBD23
		Pp1s238_53V6; Phypa_453233	PpLBD24
		Pp1s69_130V6; Phypa_437151	PpLBD25
		Pp1s190_23V6; Phypa_449788	PpLBD26
Selaginella moellendorffii	11	Selmo_105005	SmLBD1	name from Y Coudert et al., 2013
		Selmo_49084	SmLBD2
		Selmo_49261	SmLBD3
		Selmo_49607	SmLBD4
		Selmo_59179	SmLBD5
		Selmo_26920	SmLBD7
		Selmo_27657	SmLBD8
		Selmo_37532	SmLBD9
		Selmo_37566	SmLBD10
		Selmo_48883	SmLBD11
Adiantum capillus-veneris	18	cds.c3532_g1_i1	AcaLBD1	using for real
		cds.c5670_g1_i1	AcaLBD2
		cds.c14996_g1_i1	AcaLBD3
		cds.c18168_g1_i2	AcaLBD4
		cds.c10202_g1_i1	AcaLBD5
		cds.c17635_g1_i4	AcaLBD6
		cds.c27774_g1_i1	AcaLBD7
		cds.c10242_g1_i1	AcaLBD8
		cds.c1647_g1_i1	AcaLBD9
		cds.c31489_g1_i1	AcaLBD10
		cds.c7534_g1_i1	AcaLBD11
		cds.c35481_g1_i1	AcaLBD12
		cds.c21933_g1_i1	AcaLBD13
		cds.c25805_g1_i1	AcaLBD14
		cds.c43359_g1_i1	AcaLBD15
		cds.c31405_g1_i1	AcaLBD16
		cds.c9402_g1_i1	AcaLBD17
		cds.c7001_g1_i1	AcaLBD18
Picea abies	59	MA_101817g0010	PabLBD1
		MA_1026888g0010	PabLBD2
		MA_10429262g0010	PabLBD3
		MA_10434193g0010	PabLBD4
		MA_10434213g0010	PabLBD5
		MA_10434782g0020	PabLBD6
		MA_11285g0020	PabLBD7
		MA_113501g0010	PabLBD8
		MA_11699g0010	PabLBD9
		MA_122595g0010	PabLBD10
		MA_126761g0010	PabLBD11
		MA_127139g0010	PabLBD12
		MA_13024g0010	PabLBD13
		MA_131805g0010	PabLBD14
		MA_161608g0010	PabLBD15
		MA_16891g0010	PabLBD16
		MA_16891g0020	PabLBD17
		MA_170369g0010	PabLBD18
		MA_170661g0010	PabLBD19
		MA_19934g0010	PabLBD20
		MA_19975g0010	PabLBD21
		MA_223267g0010	PabLBD22
		MA_234967g0010	PabLBD23
		MA_276627g0010	PabLBD24
		MA_290245g0010	PabLBD25
		MA_292200g0010	PabLBD26
		MA_3123g0010	PabLBD27
		MA_3123g0020	PabLBD28
		MA_328535g0010	PabLBD29
		MA_35037g0010	PabLBD30
		MA_361391g0010	PabLBD31
		MA_39832g0010	PabLBD32
		MA_445236g0010	PabLBD33
		MA_451290g0010	PabLBD34
		MA_55357g0010	PabLBD35
		MA_55512g0010	PabLBD36
		MA_61242g0010	PabLBD37
		MA_63523g0010	PabLBD38
		MA_66501g0010	PabLBD39
		MA_734074g0010	PabLBD40
		MA_75731g0010	PabLBD41
		MA_77200g0010	PabLBD42
		MA_79692g0010	PabLBD43
		MA_80122g0010	PabLBD44
		MA_84752g0010	PabLBD45
		MA_85817g0010	PabLBD46
		MA_85817g0020	PabLBD47
		MA_86300g0010	PabLBD48
		MA_8854574g0010	PabLBD49
		MA_88711g0010	PabLBD50
		MA_902082g0010	PabLBD51
		MA_9135269g0010	PabLBD52
		MA_91369g0010	PabLBD53
		MA_927067g0010	PabLBD54
		MA_9412105g0010	PabLBD55
		MA_962403g0010	PabLBD56
		MA_97411g0010	PabLBD57
		MA_9839150g0010	PabLBD58
		MA_9924708g0010	PabLBD59
Amborella trichopoda	23	AmTr_v1.0_scaffold00002.310	AtrLBD1
		AmTr_v1.0_scaffold00002.340	AtrLBD2
		AmTr_v1.0_scaffold00007.227	AtrLBD3
		AmTr_v1.0_scaffold00021.148	AtrLBD4
		AmTr_v1.0_scaffold00032.103	AtrLBD5
		AmTr_v1.0_scaffold00036.3	AtrLBD6
		AmTr_v1.0_scaffold00036.4	AtrLBD7
		AmTr_v1.0_scaffold00041.18	AtrLBD8
		AmTr_v1.0_scaffold00058.116	AtrLBD9
		AmTr_v1.0_scaffold00066.113	AtrLBD10
		AmTr_v1.0_scaffold00067.108	AtrLBD11
		AmTr_v1.0_scaffold00076.41	AtrLBD12
		AmTr_v1.0_scaffold00079.30	AtrLBD13
		AmTr_v1.0_scaffold00080.69	AtrLBD14
		AmTr_v1.0_scaffold00083.21	AtrLBD15
		AmTr_v1.0_scaffold00128.37	AtrLBD16
		AmTr_v1.0_scaffold00136.1	AtrLBD17
		AmTr_v1.0_scaffold00137.18	AtrLBD18
		AmTr_v1.0_scaffold00137.41	AtrLBD19
		AmTr_v1.0_scaffold00153.12	AtrLBD20
		AmTr_v1.0_scaffold00169.24	AtrLBD21
		AmTr_v1.0_scaffold00184.19	AtrLBD22
		AmTr_v1.0_scaffold00184.20	AtrLBD23
Oryza sativa	33	Os01g07480	OsLBD11	name from Y Coudert et al., 2013	OsLBD1-1
		Os01g14030	OsLBD12		OsLBD1-2
		Os01g32770	OsLBD111		OsLBD1-11
		Os01g39070	OsLBD13		OsLBD1-3
		Os01g39150	OsLBD14		OsLBD1-4
		Os01g39160	OsLBD15		OsLBD1-5
		Os01g39220	OsLBD16		OsLBD1-6
		Os01g56530	OsLBD17		OsLBD1-7
		Os01g60960	OsLBD18		OsLBD1-8
		Os01g66590	OsLBD19/AS2		OsLBD1-9/AS2
		Os02g57490	OsLBD21/DH1		OsLBD2-1/DH1
		Os03g05500	OsLBD31/CRL1like		OsLBD3-1/CRL1-like
		Os03g05510	OsLBD32/CRL1		OsLBD3-2/CRL1
		Os03g14270	OsLBD33		OsLBD3-3
		Os03g17810	OsLBD34		OsLBD3-4
		Os03g33090	OsLBD38		OsLBD3-8
		Os03g41330	OsLBD39		OsLBD3-9
		Os03g41600	OsLBD35		OsLBD3-5
		Os03g45750	OsLBD36		OsLBD3-6
		Os03g57670	OsLBD37		OsLBD3-7
		Os05g03160	OsLBD51		OsLBD5-1
		Os05g07270	OsLBD52		OsLBD5-2
		Os05g27980	OsLBD53		OsLBD5-3
		Os05g34450	OsLBD54		OsLBD5-4
		Os07g40000	OsLBD71		OsLBD7-1
		Os08g06659	OsLBD81		OsLBD8-1
		Os08g31080	OsLBD82		OsLBD8-2
		Os08g40520	OsLBD83		OsLBD8-3
		Os08g44940	OsLBD84		OsLBD8-4
		Os09g19950	OsLBD91		OsLBD9-1
		Os10g07510	OsLBD101		OsLBD10-1
		Os11g01550	OsLBD111		OsLBD11-1
		Os12g01550	OsLBD121		OsLBD12-1
Arabidopsis thaliana	42	At1g06280	AtLBD2/ASL32	name from Y Coudert et al., 2013
		At1g07900	AtLBD1/ASL8
		At1g16530	AtLBD3/ASL9
		At1g31320	AtLBD4/ASL6
		At1g36000	AtLBD5/ASL33
		At1g65620	AtLBD6/AS2
		At1g67100	AtLBD40/ASL37
		At1g68510	AtLBD42/ASL36
		At1g72980	AtLBD7/ASL31
		At2g19510	AtLBD8/ASL34
		At2g19820	AtLBD9/ASL35
		At2g23660	AtLBD10/ASL2
		At2g28500	AtLBD11/ASL7
		At2g30130	AtLBD12/ASL5
		At2g30340	AtLBD13/ASL10
		At2g31310	AtLBD14/ASL17
		At2g40470	AtLBD15/ASL11
		At2g42430	AtLBD16/ASL18
		At2g42440	AtLBD17/ASL15
		At2g45410	AtLBD19/ASL23
		At2g45420	AtLBD18/ASL20
		At3g02550	AtLBD41/ASL38
		At3g03760	AtLBD20/ASL21
		At3g11090	AtLBD21/ASL12
		At3g13850	AtLBD22/ASL30
		At3g26620	AtLBD23/ASL14
		At3g26660	AtLBD24/ASL13
		At3g27650	AtLBD25/ASL3
		At3g27940	AtLBD26/ASL28
		At3g47870	AtLBD27/ASL29
		At3g49940	AtLBD38/ASL40
		At3g50510	AtLBD28/ASL25
		At3g58190	AtLBD29/ASL16
		At4g00210	AtLBD31/ASL22
		At4g00220	AtLBD30/ASL19/JLO
		At4g22700	AtLBD32/ASL26
		At4g37540	AtLBD39/ASL41
		At5g06080	AtLBD33/ASL24
		At5g35900	AtLBD35/ASL27
		At5g63090	AtLOB/ASL4
		At5g66870	AtLBD36/ASL1
		At5g67420	AtLBD37/ASL39

## Sheet: RKD
RKD family sequences and accession numbers
Species name	number	Locus name	Name	note
Physcomitrella patens	3	Phpat.014G016400	PpaRKD	S Koi et al., 2016
		Phpat.024G022300	PpaRWP3
		Phpat.020G024100	PpaRWP4
Marchantia polymorpha		KU987910	MpRKD
		KU987911	MpRWP1
Arabidopsis thaliana	5	AT1G18790	AthRKD1
		AT1G74480	AthRKD2
		AT5G66990	AthRKD3
		AT5G53040	AthRKD4
		AT4G35590	AthRKD5
Adiantum capillus-veneris	1	cds.c17678_g1_i1	AcaRKD4	using for real
Pinus taeda	3	lcl|PITA_000047659 unnamed protein product	PtaRKD1
		lcl|PITA_000021970 unnamed protein product	PtaRKD2
		lcl|PITA_000058296 unnamed protein product	PtaRKD3
Picea abies	1	lcl|MA_10430030g0010 high_confidence	PabRKD
Amborella trichopoda	2	evm_27.TU.AmTr_v1.0_scaffold00021.200	AtrRKD1
		evm_27.TU.AmTr_v1.0_scaffold00057.67	AtrRKD2

## Sheet: WOX
WOX family sequences and accession numbers
Species name	number	Locus name	Name	note
Ostreococcus lucimarinus	1	27102	OluWOX
Micromonas pusilla	4	fgenesh1_pg.C_50077	MpuWOX1
		fgenesh1_pg.C_90244	MpuWOX2
		EuGene.0000170339	MpuWOX3
		EuGene.0000090188	MpuWOX4
Marchantia polymorpha	1	Mapoly0014s0060.1	MpoWOX
Physcomitrella patens	3	Pp3c15_20000V3.12	PpaWOX1
		Pp3c9_13640V3.1	PpaWOX2
		Pp3c26_8569V3.1	PpaWOX3
Adiantum capillus-veneris	6	cds.c17448_g1_i1	AcaWOX1	using for real
		cds.c43162_g1_i1	AcaWOX2
		cds.c9482_g1_i1	AcaWOX3
		cds.c16738_g1_i1	AcaWOX4
		cds.c8926_g1_i1	AcaWOX5
		cds.c14976_g2_i1	AcaWOX6
Picea abies	10	MA_74653g0010	PabWOX1
		MA_121643g0010	PabWOX2
		MA_33318g0010	PabWOX3
		MA_9427942g0010	PabWOX4
		MA_8832398g0010	PabWOX5
		MA_42637g0010	PabWOX6
		MA_129591g0010	PabWOX7
		MA_10344604g0010	PabWOX8
		MA_8850184g0010	PabWOX9
		MA_747816g0010	PabWOX10
Amborella trichopoda	9	AmTr_v1.0_scaffold00010.77	AtrWOX1
		AmTr_v1.0_scaffold00012.85	AtrWOX2
		AmTr_v1.0_scaffold00021.149	AtrWOX3
		AmTr_v1.0_scaffold00023.118	AtrWOX4
		AmTr_v1.0_scaffold00029.349	AtrWOX5
		AmTr_v1.0_scaffold00044.164	AtrWOX6
		AmTr_v1.0_scaffold00051.5	AtrWOX7
		AmTr_v1.0_scaffold00119.79	AtrWOX8
		AmTr_v1.0_scaffold00405.1	AtrWOX9
Oryza sativa	13	LOC_Os01g47710.1	Os01g47710
		LOC_Os01g60270.1	Os01g60270
		LOC_Os01g62310.1	Os01g62310
		LOC_Os01g63510.1	Os01g63510
		LOC_Os03g20910.1	Os03g20910
		LOC_Os04g55590.1	Os04g55590
		LOC_Os04g56780.1	Os04g56780
		LOC_Os05g02730.1	Os05g02730
		LOC_Os05g48990.1	Os05g48990
		LOC_Os07g34880.1	Os07g34880
		LOC_Os07g48560.1	Os07g48560
		LOC_Os08g14400.1	Os08g14400
		LOC_Os12g01120.1	Os12g01120
Arabidopsis thaliana	15	AT2G17950.1	AthWUS
		AT1G46480.1	AthWOX4
		AT3G11260.1	AthWOX5
		AT2G28610.1	AthWOX3
		AT5G59340.1	AthWOX2
		AT3G18010.1	AthWOX1
		AT2G01500.1	AthWOX6
		AT5G05770.1	AthWOX7
		AT2G33880.1	AthWOX9
		AT5G45980.1	AthWOX8
		AT4G35550.1	AthWOX13
		AT1G20700.1	AthWOX14
		AT5G17810.1	AthWOX12
		AT3G03660.1	AthWOX11
		AT1G20710.1	AthWOX10
